1 **Meta-omics-aided isolation of an elusive anaerobic arsenic-methylating soil bacterium**

2

3 Karen Viacava<sup>1,2</sup>, Jiangtao Qiao<sup>1</sup>, Andrew Janowczyk<sup>3</sup>, Suresh Poudel<sup>4</sup>, Nicolas Jacquemin<sup>5</sup>,  
4 Karin Lederballe Meibom<sup>1</sup>, Him K. Shrestha<sup>4,6</sup>, Matthew C. Reid<sup>7</sup>, Robert L. Hettich<sup>4</sup>, Rizlan  
5 Bernier-Latmani<sup>1\*</sup>.

6

7 <sup>1</sup> Environmental Microbiology Laboratory, School of Architecture, Civil and Environmental  
8 Engineering, École Polytechnique Fédérale de Lausanne, Lausanne, Switzerland.

9 <sup>2</sup> Soil Science Group, Institute of Geography, University of Bern, Bern, Switzerland.

10 <sup>3</sup> Bioinformatics Core Facility, Swiss Institute of Bioinformatics, Lausanne, Switzerland.

11 <sup>4</sup> BioSciences Division, Oak Ridge National Laboratory, Oak Ridge, TN, United States.

12 <sup>5</sup> Translational Bioinformatics and Statistics, Department of Oncology, Université de  
13 Lausanne, Lausanne, Switzerland.

14 <sup>6</sup> Genome Science and Technology Graduate School, University of Tennessee, Knoxville,  
15 TN, United States.

16 <sup>7</sup> School of Civil and Environmental Engineering, Cornell University, Ithaca, NY, United  
17 States.

18 \*Corresponding author. E-mail address [rizlan.bernier-latmani@epfl.ch](mailto:rizlan.bernier-latmani@epfl.ch). Postal address EPFL  
19 ENAC IIE EML CH A1 375 (Bâtiment CH) Station 6 CH-1015 Lausanne Switzerland. Tel.  
20 +41 21 69 35001.

21 Competing Interests Statement: The authors declare there are no competing financial  
22 interests in relation to the work described. The work was funded by the Swiss National  
23 Science Foundation (SNSF) grant 310030\_176146-1 and the SNSF NCCR Microbiomes  
24 (grant # 51NF40\_180575). The work at ORNL was conducted under the Plant-Microbe  
25 Interface Science Focus Area, as supported by the U.S. Department of Energy, Office of  
26 Science, Office of Biological and Environmental Research, Genomic Science Program.

27 Key words: metagenomics, metaproteomics, metatranscriptomics, *Paraclostridium*, arsenic  
28 metabolism.

29

30 **Abstract**

31 Soil microbiomes harbour unparalleled functional and phylogenetic diversity. However,  
32 extracting isolates with a targeted function from complex microbiomes is not straightforward,  
33 particularly if the associated phenotype does not lend itself to high-throughput screening.  
34 Here, we tackle the methylation of arsenic (As) in anoxic soils. As methylation was proposed  
35 to be catalysed by sulphate-reducing bacteria. However, to date, there are no available  
36 anaerobic isolates capable of As methylation, whether sulphate-reducing or otherwise. The  
37 isolation of such a microorganism has been thwarted by the fact that the anaerobic bacteria  
38 harbouring a functional arsenite S-adenosylmethionine methyltransferase (ArsM) tested to  
39 date did not methylate As in pure culture. Additionally, fortuitous As methylation can result  
40 from the release of non-specific methyltransferases upon lysis. Thus, we combined  
41 metagenomics, metatranscriptomics, and metaproteomics to identify the microorganisms  
42 actively methylating As in anoxic soil-derived microbial cultures. Based on the metagenome-  
43 assembled genomes of microorganisms expressing *ArsM*, we isolated *Paraclostridium sp.*  
44 strain EML, which was confirmed to actively methylate As anaerobically. This work is an  
45 example of the application of meta-omics to the isolation of elusive microorganisms.

46

## 47 **Introduction**

48 Soil microbiomes represent a rich source of novel metabolisms and taxa [1–4]. However,  
49 isolating microorganisms from them to study specific functions can be challenging, and even  
50 more so in cases for which the phenotype is not identifiable with high-throughput methods  
51 [5, 6]. An example of challenging microorganisms to isolate are anaerobic As-methylating  
52 strains. Arsenic methylation, catalysed by arsenite (As(III)) S-adenosylmethionine  
53 methyltransferase (ArsM, in prokaryotes), entails the binding of one to three methyl group(s)  
54 to the As atom [7]. At present, there are no available microorganisms capable of anaerobic  
55 As methylation. This is because, adding to the constraints associated with maintaining an  
56 anoxic environment [8], there is no assay for ArsM activity that can be adapted for high-  
57 throughput assessment, despite recent endeavours [9]. Arsenic methylation occurs in  
58 anoxic, flooded rice paddy soils, is mediated by soil microorganisms [10], and results in the  
59 accumulation of methylated As in rice grains [11]. The bioaccumulation of methylated As in  
60 rice grains is considerably more efficient than that of inorganic As [12, 13].

61 The gene encoding ArsM (*arsM*) has been identified in phylogenetically diverse soil  
62 microorganisms [14–17]. Anaerobic As methylation is expected to produce a toxic trivalent  
63 monomethylated As species (MMAs(III)). The function of this transformation is hypothesized  
64 to be microbial warfare, by which the As-methylating organism inhibits microbial competitors  
65 via the production of MMAs(III) [18, 19]. If that is confirmed, it is conceivable that As  
66 methylation may not occur in pure cultures but only in microbial communities, triggered by  
67 metabolites produced by the microbiota. Alternatively, *arsM*-harbouring microorganisms that  
68 express As(III) efflux pump(s), the major pathway of As resistance within bacteria [20], may  
69 not methylate As due to the efficient removal of As(III) from the cytoplasm, which is the  
70 location of ArsM [21, 22]. This effect could be direct, i.e., insufficient substrate concentration,  
71 or indirect, i.e., the intracellular As(III) concentration is too low to induce *arsM* expression.  
72 Either occurrence (microbial warfare or rapid As(III) efflux) would render the isolation of pure  
73 cultures of As-methylating anaerobes very challenging using standard approaches. The

74 latter hypothesis is supported by recent work showing the lack of As methylation by  
75 anaerobic pure cultures harbouring functional ArsM enzymes [22].

76 An additional complexity is evidence for the fortuitous methylation of As upon cell lysis and  
77 the release of methyltransferases. This fortuitous activity was suggested for the methanogen  
78 *Methanosarcina mazei*, for which As methylation was initiated only when cell viability  
79 decreased [22], and by the *in vitro* methylation of various metals, including As, by MtaA, a  
80 methyltransferase involved in methanogenesis [23]. Thus, As methylation activity in cultures  
81 incubated beyond the exponential phase may simply be an experimental artefact [22].  
82 Finally, the detection of methylated As requires relatively complex analytical tools (high  
83 pressure liquid chromatography coupled to inductively-coupled plasma mass spectrometry,  
84 HPLC-ICP-MS) that do not lend themselves readily to high-throughput screening of a large  
85 number of colonies [9]. As a result of these challenges, there are no anaerobic  
86 microorganisms available known to actively methylate As despite many efforts to identify  
87 them. In one instance, researchers had identified a Gram-positive sulphate-reducing  
88 bacterium (SRB) [24] that was reported to methylate As but this isolate is no longer  
89 available, precluding further investigation.

90 Thus, this study aimed to conclusively identify an active anaerobic As methylator in soil-  
91 derived microbial cultures using a multi-omics approach. The experimental strategy was to  
92 build Metagenome-Assembled Genomes (MAGs) from metagenomic data and to identify the  
93 subset of MAGs harbouring the gene *arsM* that also expressed the *arsM* RNA transcript  
94 (metatranscriptomics) and/or the enzyme ArsM (metaproteomics). Based on the genetic  
95 information from the target MAG, an isolation strategy was devised that allowed the recovery  
96 of a pure culture, later confirmed to be a novel anoxic As-methylating strain.

97

## 98 **Materials and methods**

### 99 *Rice paddy soil microbiomes*

100 The soil-derived cultures consisted of two anaerobic microbial enrichments derived from a  
101 Vietnamese rice paddy soil and described in Reid *et al.* [25]. The microbiota from the first

102 soil-derived microbiome was grown in  $\frac{1}{4}$  strength tryptic soy broth (TSB) medium ( $7.5 \text{ g l}^{-1}$   
103 TSB), used previously to enrich As-methylating microbes from a lake sediment [26], and  
104 henceforth referred to as the TSB culture. The medium for the second soil-derived  
105 microbiome, in addition to  $\frac{1}{4}$  strength TSB, included electron acceptors and two additional  
106 carbon sources to simultaneously allow the growth of nitrate-, iron-, and sulphate-reducers,  
107 as well as fermenters and methanogens (EA medium: 5 mM  $\text{NaNO}_3$ , 5 mM  $\text{Na}_2\text{SO}_4$ , 5 mM  
108 ferric citrate,  $0.2 \text{ g l}^{-1}$  yeast extract (Oxoid, Hampshire, UK) and  $1 \text{ g l}^{-1}$  cellobiose, pH 7). This  
109 enrichment will be referred to as the EA culture. Both media were boiled, cooled down under  
110 100%  $\text{N}_2$  gas and 50 ml of medium were dispensed into 100-ml serum bottles. The bottle  
111 headspace was flushed with 100%  $\text{N}_2$  gas prior to autoclaving. All culture manipulations  
112 were carried out using  $\text{N}_2$ -flushed syringes and needles. Cultures were grown at  $30^\circ\text{C}$ .  
113 Growth was quantified using optical density at 600 nm ( $\text{OD}_{600}$ ).

114

#### 115 *Arsenic methylation assays*

116 Pre-cultures from each enrichment were started from  $-80^\circ\text{C}$  glycerol stocks. The EA culture  
117 started from the glycerol stock was transferred only after a dark precipitate, presumably iron  
118 sulphide resulting from sulphate reduction, was formed. The first experimental set-up  
119 consisted of bottles containing medium amended with As(III) as  $\text{NaAsO}_2$  (+As condition) pre-  
120 inoculation or unamended (no-As control). For this set-up, cell pellets were sampled for DNA  
121 sequencing and proteome characterization during the stationary phase, and for RNA  
122 sequencing at the mid-exponential growth phase (see Figures S1, S2 and S3 in  
123 Supplementary Information (SI)). In a second experimental set-up, cultures were grown in  
124 unamended (no As(III) added) medium and As(III) was added at the mid-exponential growth  
125 phase. For this set-up, cell pellets were sampled before (no-As control) and 30 min after As  
126 amendment (+As condition) and were used solely for a second transcriptomic analysis.  
127 Triplicate biological experiments were performed for each condition (no-As, +As) and per  
128 soil-derived enrichment and were used for DNA and RNA sequencing and metaproteome  
129 characterization. Sampling for soluble As species, determination of As speciation, and total

130 As concentration are described in SI.

131

132 *DNA sequencing and metagenomic analysis*

133 DNA was extracted from the pellet (10 min, 4,500 g) of 4 ml of culture using the DNeasy  
134 Power Soil Kit (Qiagen, Hilden, Germany) homogenizing with a Precellys 24 Tissue  
135 Homogenizer (Bertin Instruments, Montigny-le-Bretonneux, France) (6,500 rpm for 10 s,  
136 repeated 3x with 10 s pause intervals). Metagenomic sequencing was performed by the  
137 Genomics Platform of the University of Geneva, Switzerland (iGE3) on a HiSeq 4000  
138 (Illumina, San Diego, CA, US). Libraries were multiplexed and prepared using 100-base  
139 reads with paired ends according to the Nextera DNA Flex Library Preparation Kit protocol  
140 (Illumina). The quality of sequence reads was assessed with FastQC [27] and duplicated  
141 reads eliminated by FastUniq [28]. Reads from all biological replicates within the same  
142 experimental condition were assembled into contigs using MegaHit [29]. The contig  
143 abundance was determined by aligning the sequencing reads from each biological replicate  
144 back to the assembled contigs using Kallisto [30, 31]. The abundance for each gene was  
145 considered equivalent to the abundance of the contig in which it was encoded. Gene  
146 abundance is reported as 'transcripts per million' (TPM), referred to as TPM-DNA when used  
147 for gene abundance. TPM includes normalization for gene length and read sequencing  
148 depth [32]. Prodigal was used for the prediction of protein-coding genes [33], generating  
149 protein sequence libraries for each culture (EA, TSB) and condition (no-As control, +As  
150 condition). The annotation server GhostKOALA [34] was used to assign a KEGG Orthology  
151 (KO) database number to each protein-coding gene to identify its encoded function and  
152 taxonomic category. The 16S small subunit (SSU) rRNA sequences were identified in the  
153 contigs and their taxonomy assigned by Metaxa2 [35]. The relative abundance of the 16S  
154 SSU rRNA sequences identified in each of the four metagenomes was quantified using the  
155 Kallisto-calculated contig abundance. Contigs with length >2,000 bp were clustered into bins  
156 based on composition and coverage using CONCOCT [36], MetaBAT2 [37] and MaxBin 2.0  
157 [38]. The final bin set was obtained by using the Bin\_refinement module from MetaWRAP

158 [39]. Completeness, contamination, strain heterogeneity and community (%) in contigs for  
159 each bin were calculated using CheckM [40]. Matching bins between the no-As and +As  
160 metagenomes, and between the EA +As and TSB +As metagenomes were identified by  
161 pairwise comparison of the predicted genomes using dRep [41]. Bins with an average  
162 nucleotide identity >95% were considered identical genomes.

163

#### 164 *RNA sequencing and metatranscriptomic analysis*

165 Each culture (5 ml) was harvested at mid-exponential phase for metatranscriptomic analysis.  
166 The cells were lysed and the RNA purified using the RNeasy Mini Kit following the  
167 manufacturer's instructions (RNAprotect Bacteria, Qiagen). The purified RNA was DNase-I  
168 treated (Promega, Madison, WI, US) (1h, 37 °C) and cleaned using the RNeasy Mini Kit a  
169 second time. Ribosomal RNA (rRNA) depletion (kit QIAseq FastSelect -5S/16S/23S,  
170 Qiagen), library preparation using single-end 100 bases reads (TrueSeq Stranded mRNA,  
171 Illumina) and RNA sequencing (on a HiSeq 4000) were performed by the iGE3 Platform.  
172 Reads were quality-assessed by FastQC, trimmed by Trimmomatic [42], post-sequencing  
173 rRNA-depleted by SortMeRNA [43] and aligned to their corresponding protein sequence  
174 library by Bowtie2 [44]. The program featureCounts [45] was employed to count the number  
175 of RNA reads aligned to the Prodigal-predicted protein-coding genes. The raw counts were  
176 used to calculate the TPM, referred as TPM-RNA when employed for transcript abundance.  
177 Finally, to assess RNA expression changes in the +As condition relative to the no-As  
178 condition, a differential abundance analysis was performed using the DESeq2 package [46]  
179 using the protein sequence libraries from the +As condition to align the RNA reads. A gene  
180 was considered to have a significant difference in transcription when the absolute  $\log_2$  fold  
181 change was  $\geq 1$  (i.e.,  $0.5 \geq \text{fold change} \geq 2$ ) and the adjusted  $q$  value  $\leq 0.05$ .

182

#### 183 *Metaproteome characterization and metaproteomic analysis*

184 The metaproteome analysis was performed at Oak Ridge National Laboratory (Oak Ridge,  
185 TN, US). Biomass pellets from 100 ml of culture were washed with 100 mM  $\text{NH}_4\text{HCO}_3$  buffer

186 (ABC) (pH 8.0), re-suspended in lysis buffer (4% sodium dodecyl sulphate, 100 mM Tris-  
187 HCl, pH 8.0) and disrupted by bead-beating. Lysate proteins were reduced with 5 mM  
188 dithiothreitol (30 min, 37 °C), alkylated with 15 mM iodoacetamide (30 min in the dark, room  
189 temperature) and isolated by a chloroform-methanol extraction. Extracted proteins were  
190 solubilized in 4% sodium deoxycholate (SDC) in ABC and the concentration estimated with a  
191 Nanodrop (Thermo Fisher Scientific, Waltham, MA, US). Sequencing-grade trypsin  
192 (Promega) at a 1:75 enzyme:protein ratio (w/w) was used to digest the proteins and formic  
193 acid (1% final concentration) was used to precipitate the SDC and collect tryptic peptides.  
194 Aliquots of 12 µg of peptides were analysed by 2D LC-MS/MS consisting of a Vanquish  
195 UHPLC connected to a Q Exactive Plus MS (Thermo Fisher Scientific). Spectral data were  
196 collected using MudPIT (multidimensional protein identification technology) as described  
197 previously [47, 48]. Peptides were separated in three steps (35, 100, and 500 mM  
198 ammonium acetate eluent) with organic gradients after each step. Eluted peptides were  
199 measured and sequenced by data-dependent acquisition using previously described  
200 parameters [49].

201 Protein databases were created for the +As experimental condition (EA +As and TSB +As)  
202 from the corresponding protein sequence libraries generated by Prodigal. The MS/MS  
203 spectra raw files were processed in Proteome Discoverer version 2.4 (Thermo Fisher  
204 Scientific) with MS Amanda 2.0 [50] and Percolator [51]. Spectral data were searched  
205 against the protein database of the corresponding culture (i.e., EA or TSB). The following  
206 parameters were used in the search algorithm MS-Amanda 2.0 to derive tryptic peptides:  
207 MS1 tolerance = 5 ppm; MS2 tolerance = 0.02 Da; missed cleavages = 2; carbamidomethyl  
208 (C, + 57.021 Da) as static modification; and oxidation (M, + 15.995 Da) as dynamic  
209 modifications. The false discovery rate (FDR) threshold was set to 1% for strict FDR and 5%  
210 for relaxed FDR at the peptide-spectrum matched (PSM), peptide, and protein levels. FDR-  
211 controlled peptides were then quantified according to the chromatographic area-under-the-  
212 curve and mapped to their respective proteins. Areas were summed to estimate protein-level  
213 abundance.



214 For differential abundance analysis of proteins, the spectral data from the no-As control, EA  
215 no As and TSB no As, were searched against the EA +As and TSB +As protein databases,  
216 respectively. All the above-described parameters were maintained. The proteins with at least  
217 one peptide detected were exported from Proteome Discoverer. Protein data matrix from EA  
218 no As and EA +As were merged and TSB no As and TSB +As were merged. Protein  
219 abundance values were  $\log_2$  transformed, LOESS-normalized among biological replicates  
220 and mean-centred across all conditions using the software InfernoRDN [52]. Stochastic  
221 sampling of the proteins was filtered by removing the proteins without abundance value in at  
222 least two of the biological triplicates in at least one condition (no-As control or +As  
223 condition). Remaining missing data were imputed by random numbers drawn from a normal  
224 distribution (width = 0.3 and downshift = 2.8 using the Perseus software [http://www.perseus-](http://www.perseus-framework.org)  
225 [framework.org](http://www.perseus-framework.org)) [53]. The differentially abundant proteins were identified by Student t-test  
226 method with adjusted  $q$  value  $\leq 0.05$ . Proteins were further filtered using the absolute  $\log_2$   
227 fold change  $\geq 1$ .

228 The isolation of the *Paraclostridium sp.* strain EML is described in SI.

229

## 230 **Results**

### 231 *Arsenic methylation by soil-derived microbiomes*

232 The first experimental set-up yielded samples for the metagenome, metaproteome and one  
233 of the metatranscriptomes (labeled metatranscriptome G for 'growth in the presence of As')  
234 (Figures S1, S2 and S3). The second set-up, assessing the microbiota's short-term  
235 response to As(III), provided sample for the second metatranscriptome (labeled  
236 metatranscriptome R for 'response to arsenic addition') (Figures S1-A and S2-A). Both EA  
237 and TSB cultures exhibited As methylation, reaching an efficiency of As(III) transformation of  
238 27.7% and 19.5%, respectively (Figures S1 and S2).

239

### 240 *Microbiota composition*

241 The taxonomic classification of 16S SSU rRNA sequences show that, although eukaryotic

242 DNA was also identified, the main fraction of the communities was bacterial ( $>89.0 \pm 0.8\%$  for  
243 EA cultures and  $>98.5 \pm 0.3\%$  for TSB cultures, relative abundance) and was distributed  
244 amongst eight operational taxonomic units (OTUs) at the order level (Figure 1 and Tables  
245 S1-S4). Statistically significant changes (unpaired Student t-test and no significant difference  
246 considered when  $p$  value  $> 0.05$ ) in the OTUs relative abundances, +As condition versus no-  
247 As control, are described in SI and summarized in Tables S5 and S6.

248

#### 249 *MAG selection*

250 The contigs from the four metagenomes, EA (+As, no-As control) and TSB (+As, no-As  
251 control), were clustered separately into bins. High-quality ( $\geq 90\%$  completeness and  $\leq 5\%$   
252 contamination) bins were designated as MAGs [54]. For the +As condition, the parsing  
253 process led to a total of 36 MAGs (Table 1). Additionally, matching bins were sought in the  
254 bins from the no-As control cultures (Tables S7 and S8). Only one of the 36 MAGs in the  
255 +As condition was left unpaired (TSB MAG 8).

256 For each MAG, a lineage was assigned by CheckM, based on lineage-specific marker genes  
257 [40]. The MAGs identified belonged to the phyla: *Firmicutes* (orders *Clostridiales*,  
258 *Selenomonadales* and *Lactobacillales*, and the genus *Clostridium*), *Proteobacteria*  
259 (*Enterobacteriaceae* family and *Deltaproteobacteria* class) and *Bacteroidetes* (order  
260 *Bacteroidales*). Fifteen MAGs presented non-zero strain heterogeneity (Table 1), an index of  
261 the phylogenetic relatedness of binned contigs based on the amino acid identity of the  
262 encoded proteins. For ten MAGs, the value is  $\geq 50\%$ , suggesting some phylogenetic relation  
263 with the contaminating strains. Five MAGs had heterogeneity values  $\leq 33.33\%$ , suggesting  
264 contamination with microorganisms that are not closely related. In the remaining 21 MAGs,  
265 the strain heterogeneity is 0%, i.e., no strain heterogeneity or no contamination (Tables S7  
266 and S8).

267 Changes in the relative abundance of MAGs (no-As control vs. +As condition), relatedness  
268 of the +As EA and TSB microbial communities, along with the presence, transcription and  
269 translation of genes encoding key enzymes from major metabolic pathways of each MAG in

270 the +As condition are included in SI.

271

### 272 *Arsenic resistance genes*

273 The metagenomic libraries from the +As condition of the EA and TSB cultures were mined  
274 for arsenic resistance (*ars*) genes and their encoded proteins (the pipeline is described in  
275 SI). A total of 309 and 282 genes were annotated as *ars* genes in the EA and TSB +As  
276 metagenomic libraries, respectively (Tables S9 and S10). Of those, 255 and 226 were  
277 considered correctly annotated as *ars* genes based on BLAST and HMMER (refer to SI for  
278 pipeline), and 225 and 147 had above-threshold DNA abundances, respectively (Figure 2)  
279 (refer to SI for abundance threshold values). Individual abundance values of *ars* genes,  
280 transcripts and proteins in the +As condition and the no-As control and their transcript and  
281 protein relative abundance values in the +As condition vs. the no-As control for each MAG  
282 group from the EA and TSB cultures are available in Tables S11 and S12, respectively.

283 The *ars* genes encode proteins involved in the detoxification of As oxyanions: *arsB* and *acr3*,  
284 encoding As(III)-efflux systems; *arsA*, encoding the ATPase energizing the efflux of As(III)  
285 and As(III) chaperone; *arsD*, encoding a weak *ars* operon repressor [55]; *arsC1* and *arsC2*,  
286 encoding As(V) reductases coupling As reduction to the oxidation of glutaredoxin or  
287 thioredoxin, respectively; and *arsR* genes encoding As(III)-regulated repressors (ArsR1,  
288 ArsR2, and ArsR3) classified based on the location of the As(III)-binding cysteine residues  
289 [56–58].

290 The most common *ars* genes in EA and TSB culture metagenomes were *arsR*, *arsC*, and  
291 *arsP* (Figure 2). The first two genes are part of the canonical *ars* operon *arsRBC* [59], whilst  
292 *arsP*, encoding a recently discovered membrane transporter, has been found to be widely  
293 distributed in bacterial genomes [20]. Most of the surveyed *arsP* genes, 57% in EA and 50%  
294 in TSB, are encoded in putative *ars* operons, represented by *ars* genes contiguously  
295 encoded in the same contig (Tables S11 and S12), supporting their As-related function and  
296 correct annotation. The next most abundant genes were those responsible for As(III) efflux  
297 (*arsB*, *acr3*, and *arsA*), typically found in organisms living in reducing environments in

298 association with *arsC* [16, 60]. Finally, *arsM* and the two genes, *arsI* and *arsH*, encoding  
299 MMAs(III)-resistance mechanisms, were the least recurrent genes in the metagenomes. The  
300 results of gene and protein relative expression vs. the no-As control of the *ars* genes  
301 involved in the metabolism of inorganic As in the MAGs are described in SI.

302

### 303 *Arsenic-methylating MAGs*

304 The *arsM* gene can be expressed at similar, or slightly different levels in the absence or  
305 presence of As(III) in some organisms [61, 62], but expressed at significantly higher levels in  
306 the presence of As(III) in others [63–66]. Thus, we sought to identify *arsM* genes transcribed  
307 and ArsM proteins showing increased expression in the +As condition relative to the no-As  
308 control (Figure 3) but also those simply exhibiting expression, not necessarily increased  
309 relative to the control (Figure S4).

310 Sixteen phylogenetically distinct *arsM* genes were identified in the EA +As metagenome, but  
311 increased transcriptome reads or peptides (relative to the no-As control) were only detected  
312 for three genes (Figure 3). The first is an *arsM* in *Clostridiales* EA MAG 8 classified by  
313 GhostKOALA as belonging to *Paeniclostridium sordellii* (EA MAG 8, *arsM*-1, psor type  
314 strain, in Table S11). The second was found in *Clostridium* EA MAG 9, also detected in the  
315 metaproteome, and the GhostKOALA taxonomic classification of the corresponding gene  
316 (EA MAG 9, *arsM*-1 in Table S11) revealed that it was attributed to the unclassified species  
317 *Ruminococcaceae bacterium* CPB6 (Figure 3, Table S11) [67]. Finally, the third *arsM* was  
318 obtained from transcriptomic data but not clustered in any EA MAG (EA unbinned, *arsM*-5 in  
319 Table S11) and likewise classified as pertaining to *Paeniclostridium sordellii*.

320 In the TSB +As metagenome, nine distinct *arsM* genes were identified but none were  
321 detected in the metatranscriptome and only one exhibited increased expression in the  
322 metaproteome (Figure 3). It corresponds to an *arsM* gene from MAG 9 (TSB MAG 9, *arsM*-2  
323 in Table S12). The expressed ArsM protein was assigned by GhostKOALA to a *Clostridiales*  
324 strain: *Clostridium botulinum* (*cby* type strain) (TSB MAG 9, *arsM*-2) (Figure 3, Table S12).  
325 Finally, there was one *arsM* expressed in the TSB +As metaproteome but with no increased

326 expression relative to the no-As control, it was classified as *Ruminococcaceae bacterium*  
327 CPB6 (TSB MAG 9, *arsM-1*) (Figure S4), the same organism identified in the EA culture (EA  
328 MAG 9, *arsM-1*).

329 In addition to evidence for active As methylation, there was evidence for active detoxification  
330 of methylated arsenic. Indeed, the metagenome included genes encoding proteins involved  
331 in the metabolism of methylated As such as *arsH*, *arsI*, *arsP*, and *arsR4* (Figures 2 and 3).  
332 These genes encode proteins involved in the detoxification of methylated arsenic like  
333 MMAs(III) and roxarsone: the oxidase Arsh, responsible for the oxidation of trivalent  
334 methylated As to the less toxic pentavalent form [68]; the demethylase Arsl that removes  
335 methyl groups from the As atom [69]; and the transmembrane transporter ArsP, thought to  
336 efflux methylated As [70]. The *arsR4* gene encodes an atypical MMAs(III)-responsive ArsR  
337 repressor, containing only two conserved cysteine residues [71]. The *Enterobacteriaceae*  
338 TSB MAG 14 exhibited activity of the oxygen-dependent Arsh protein [68] (Figure 3). An  
339 *arsR4*, shown to induce expression of *arsP* in the presence of MMAs(III) [71], had increased  
340 transcription along with an *arsP* encoded in the same contig in the *Selenomonadales* TSB  
341 MAG 19 (Figure 3, Table S12). Both gene transcripts were <5 TPM-RNA (Table S12) and  
342 thus, were not considered as transcribed in Figure S4. Finally, an Arsl protein, taxonomically  
343 related to class *Clostridia* (*[Eubacterium] rectale*), was expressed but encoded in an  
344 unbinned gene from the EA culture (Figure 3, Table S12).

345

#### 346 *Isolation of an arsenic-methylating anaerobic microorganism*

347 Based on the analysis of the active metabolic activity from the EA MAG 8, expressing an  
348 ArsM (Figure S5), an appropriate selective medium was identified for its isolation. We  
349 utilized the fact that this MAG harbours and expresses the anaerobic assimilatory sulphite  
350 reductase encoded by the *asrABC* operon which is responsible for the NADH-dependent  
351 reduction of sulphite to sulphide [72–74] in sulphite-reducing *Clostridia* (SRC). From the nine  
352 *Clostridia* MAGs, only two expressed this capability in the EA microbiome (Figure S5). Thus,  
353 the isolation relied on growing the EA culture on agar medium selective for the SRC

354 phenotype. In TSC agar, designed for the enumeration of *Clostridium perfringens* in food  
355 [75], the colonies from SRC are black, as the ammonium ferric citrate forms iron sulphide  
356 during sulphite reduction. Additionally, D-cycloserine acts a selective agent for the isolation  
357 of *Clostridia* strains [76] while inhibiting facultative anaerobes [75]. Finally, the bromocresol  
358 purple contained in the agar allows the identification of sucrose fermenters, resulting in a  
359 change of colour from purple to yellow. As none of the genes involved in sucrose transport  
360 or hydrolysis were binned in EA *Clostridiales* MAG 8 (Figure S5), only non-sucrose  
361 fermenting black colonies were considered. Those colonies were selected and using a  
362 colony PCR screen specifically targeting the *arsM* gene of EA MAG 8, we isolated a  
363 *Clostridiales* strain encoding the gene of the expressed ArsM in the EA MAG 8 (protein id  
364 k119\_30669\_28, Table S11) (Figure S6).

365 The isolate consists of non-sucrose-fermenting, rod-shaped and spore-forming bacteria  
366 forming convex and circular black colonies on TSC agar (Figures S7 and S8). The BLAST  
367 (NCBI) search of the 16S rRNA sequence gives >99% identity to *Paraclostridium* strains  
368 (Table S13). On the basis of the 16S rRNA sequence, we assign the following name to the  
369 bacterium: “*Paraclostridium* species str. EML”. Strain EML was tested for As methylation  
370 under anaerobic conditions with 25  $\mu\text{M}$  As(III). The growth of strain EML was hindered by  
371 As(III) (Figure 4-A) and starting from ~4 hours, the isolate transformed As(III) to  
372 monomethylated soluble As representing  $48.3\pm 1.5\%$  of the soluble arsenic in the culture  
373 after 83 h (panels B and C from Figure 4). A fraction ( $14.7\pm 0.6 \mu\text{M}$ ) of the arsenic was found  
374 associated with biomass almost exclusively as inorganic As (Figure 4-D).

375

## 376 **Discussion**

377 Our results demonstrate the successful translation of multi-omic information to a specific  
378 strategy for targeted microbial isolation. The metagenomes from the anaerobic soil-derived  
379 cultures identified the potential for As methylation in microorganisms from diverse taxa.  
380 While there were a large number of *ars* genes in the metagenomes, only a small proportion

381 was transcribed or translated in the presence of As when compared to the no-As control  
382 (Figure 2). This contrast was particularly evident for the gene responsible for As methylation,  
383 *arsM*. The post-genomic approaches of community gene and protein expression in TSB as  
384 in EA soil-derived microbiomes clearly pointed to the active As-methylating role of various  
385 fermenting bacteria from the order *Clostridiales*. This information paved the way for the  
386 identification of As-methylating microorganisms and the successful isolation of an anaerobic  
387 As methylator.

388 The TSB and EA media were chosen to selectively enrich for putative As methylators from  
389 the microbial soil community based on the study from Bright *et al.*, in which lake sediments  
390 enriched in TSB medium, either sulphate-amended or unamended, were shown to have  
391 greater As methylation rates than in iron- or manganese-reducing TSB cultures [26]. The  
392 selected media caused a great shift in the original soil microbial diversity [25] along with the  
393 loss of putative As-methylating microorganisms. Nonetheless, the As-methylating TSB and  
394 EA soil-derived cultures offered the opportunity to study active As methylation from paddy-  
395 soil microbiota in an environment that is less complex than soil but that remains  
396 environmentally relevant. In contrast to soil slurries, the absence of soil minerals in the soil-  
397 derived cultures facilitated the detection of soluble methylarsenicals and the extraction of  
398 DNA, RNA and proteins. The multi-omic approach made it possible to identify putative  
399 microorganisms driving As methylation and their metabolism. Targeting a specific *arsM* gene  
400 rather than the synthesis of methylarsenicals greatly accelerated colony screening, as  
401 colony PCR could be employed instead of analytical detection by HPLC-ICP-MS.

402 Had only the metagenomic approach been implemented, the data would have pointed to  
403 SRB MAGs as putative As methylators, as they harboured the most abundant *arsM* genes  
404 (Figure 5). Indeed, SRB have been proposed as drivers of As methylation in rice paddy soils  
405 based on the correlation in the abundance of *arsM* and dissimilatory sulphite reductase (*dsr*)  
406 genes [77] and RNA transcripts [78], and a decrease in As methylation by the addition  
407 chemical inhibitors of dissimilatory sulphate reduction (DSR) [77, 78]. Additionally, the use of  
408 degenerate primers for *arsM* amplification may underestimate *arsM* phylogenetic diversity, a

409 drawback overcome by metagenomic and metatranscriptomic sequencing. In the present  
410 findings, the SRB *Deltaproteobacteria* MAGs, although actively reducing sulphate (Figures  
411 S5 and S9), did not exhibit As-methylating activity as their *arsM* genes were neither  
412 transcribed nor translated (Figure 5). *Desulfovibrio* MAGs were metabolically active in both  
413 cultures, but amongst all their encoded *ars* genes, only an *arsR3* exhibited increased  
414 expression in the presence of As(III), providing strong evidence for their lack of involvement  
415 in As methylation in the TSB and EA cultures.

416 Previous work had identified another As-methylating *Clostridiales* strain, *Clostridium* sp.  
417 BXM [24], that performed fermentation and DSR but that is no longer available. The sole  
418 attribution of As-methylating activity to fermenting Firmicutes in that work, along with the  
419 isolation of the present sulphite-reducing fermenter, point to a key role for fermenting  
420 *Clostridiales* microorganisms harbouring sulphur-related metabolism in As methylation.  
421 Other studies have reported an increase in As methylation efficiency after the amendment of  
422 sulphate [79] or organic matter to soil [15, 80–82], or after the increase in dissolved organic  
423 carbon in soil [83]. The positive impact of sulphate amendment on As methylation was  
424 interpreted as pointing to the role of SRB in As methylation [79]. Here, we offer an  
425 alternative explanation, supported by examples of organic amendments enhancing As  
426 methylation [15, 80–82]. The sulphate amendment could have indirectly increased the  
427 availability of short-chain fatty acids through DSR, providing fermentable substrates. Thus,  
428 we propose that direct or indirect organic amendments result in the enrichment of fermenting  
429 communities, and consequently, in an increase in As methylation.

430 It was previously proposed that the As-methylating activity of anaerobic microorganisms may  
431 be limited by efficient efflux of intracellular As(III) [22], or that it may function as a defensive  
432 response against nutrient competition [18]. Indeed, the identification of MAGs exhibiting a  
433 detoxification response to methylarsenicals supports the hypothesis of the role of  
434 monomethylated As as an arsenic-bearing antibiotic. Although the expression of *ArsI* and  
435 *ArsH*, catalysing oxygen-dependent MMAs(III)-resistance mechanisms (Figure 3), is difficult  
436 to reconcile with anoxic conditions, it is conceivable that these proteins are capable of



437 additional functions in the absence of O<sub>2</sub>. Up until now, the lack of available anaerobic  
438 microbial isolates able to methylate As *in vitro* [22] precluded the investigation of the  
439 hypotheses raised above. This work represents the first study applying a combination of  
440 three meta-omic techniques in order to characterize As metabolism in microbial communities  
441 and to perform meta-omics-aided isolation of a microorganism [84][85]. The successful  
442 isolation of *Paraclostridium* sp. EML is part of the “new era of omics information-guided  
443 microbial cultivation technology” described by Gutleben *et al.* [84] and represents a  
444 milestone to obtain novel targeted microbial isolates from the environment and to elucidate  
445 the controls on anaerobic As methylation.

446 Further work is needed to elucidate why ArsM expression was restricted to members of  
447 *Clostridiales* fermenters and did not occur in other organisms harbouring *arsM* genes. The  
448 availability of As-methylating anaerobes will allow investigation of why the *arsM* gene  
449 evolved under an anoxic atmosphere [86], of the controls on the production of toxic  
450 methylated As species in flooded rice paddies, and the development of microbially-mediated  
451 remediation technologies for As-contaminated soils via the synthesis of volatile  
452 methylarsenicals [87, 88].

453

#### 454 **Acknowledgements**

455 The work was funded by the Swiss National Science Foundation (SNSF) grant  
456 310030\_176146-1 and the SNSF NCCR Microbiomes (grant # 51NF40\_180575). The work  
457 at ORNL was conducted under the Plant-Microbe Interface Science Focus Area, as  
458 supported by the U.S. Department of Energy, Office of Science, Office of Biological and  
459 Environmental Research, Genomic Science Program.

460

#### 461 **Data availability**

462 Metagenomic and metatranscriptomic raw sequencing reads are available at the National  
463 Centre for Biotechnology Information (NCBI) Sequence Read Archive (SRA), BioProject  
464 PRJNA714492 (post publication). Data from the meta-omic analyses and source data from

465 figures are available in Zenodo data repository (10.5281/zenodo.4605527, post publication).

466

#### 467 **Conflict of interest**

468 The authors declare no conflict of interest.

469

#### 470 **Figures Legends**

471 **Figure 1. Operational taxonomic units (OTUs) at order and genus level (with > 1%**  
472 **relative abundance at genus level) identified from 16S SSU rRNA sequences from**  
473 **soil-derived cultures.** Abbreviations: EA no As: EA culture no-As control EA +As: EA  
474 culture +As condition, TSB no As: TSB culture no-As control TSB +As: TSB culture +As  
475 condition. OTUs at the order level are indicated in bold in the legend. Plotted values are the  
476 average relative abundance and together with SD values and Student t test results are  
477 available in Tables S5 and S6.

478

479 **Figure 2. Number of *ars* genes, encoded in the +As condition cultures and with**  
480 **increased expression in metatranscriptomes/metaproteome relative to no-As**  
481 **controls.** Number of *ars* genes encoded in metagenomes and with increased expression in  
482 metatranscriptomes, R or G, or metaproteomes and the non-redundant overlap between  
483 genes with increased expression in metatranscriptomes and/or metaproteomes from +As  
484 condition EA (left panels) and TSB (right panels) cultures. Bar length and numbers on the  
485 right side of the bars correspond to the number of genes per *ars* gene category. Bold  
486 numbers on the lower left corner of each panel correspond to the sum of all *ars* genes per  
487 category.

488

489 **Figure 3. Distribution of *ars* genes involved in methylated arsenic metabolism**  
490 **encoded in MAGs from the +As condition and differentially expressed in**  
491 **metatranscriptomes/metaproteome relative to the no-As EA control.** Each numbered  
492 box represents an *ars* gene. The number in each box corresponds to the “Numbering”

493 column in Tables S11 and S12 where individual gene abundance and fold change values  
494 can be found. Com. (%): community (%) as defined in caption from Table 1.

495

496 **Figure 4. Isolate “*Paraclostridium* sp. EML”:** (A) growth as OD<sub>600</sub> with 25 µM As(III) and  
497 without, (B) proportion of soluble arsenic species in filtered medium containing 25 µM As(III),  
498 (C) concentration of arsenic species soluble in filtered medium containing 25 µM As(III)  
499 (solid lines) and biomass-bound (dashed lines) and (D) proportion of biomass-bound arsenic  
500 species. Data points and bars represent the mean value and error bars, plus and minus one  
501 standard deviation. Individual values for each measurement and biological replicate are  
502 available in Tables S23 and S24.

503

504 **Figure 5. Gene abundance of *arsM* genes in MAGs from the +As condition cultures.**

505 Coloured bars correspond to *arsM* genes with increased expression in the metaproteome  
506 (blue-green) or in the metatranscriptome G (purple) from +As condition relative to the no-As  
507 control in EA (left panel) and TSB (right panel) cultures. The taxonomic classification shown  
508 on the right side of the error bars for selected *arsM* genes corresponds to the individual gene  
509 classification assigned by GhostKOALA - “Genus” column in Tables S11 and S12. Columns  
510 with matching symbols on the right side of the error bars, correspond to matching *arsM*  
511 genes between the cultures. Individual gene abundance can be found in Tables S11 and  
512 S12. Numbers inside bar and bar length represent mean and error bars one standard  
513 deviation.

514

#### 515 **Table Legend**

516 **Table 1. Metagenome assembled genomes (MAGs) from EA (upper Table A) and TSB**  
517 **(lower Table B) cultures in the +As condition.** Marker lineage: taxonomic rank set by  
518 CheckM. Completeness and contamination (%): estimated completeness and contamination  
519 of genome as determined by CheckM from the presence/absence of single-copy marker  
520 genes and the expected colocalization of these genes. Strain heterogeneity: index between

521 0 and 100 where a value of 0 means no strain heterogeneity, high values suggest the  
522 majority of reported contamination is from closely related organisms (i.e., potentially the  
523 same species) and low values suggest the majority of contamination is from phylogenetically  
524 diverse sources. Proportion of binned proteins assigned to MAG (%): number of protein-  
525 coding genes assigned to the MAG divided by the total number of protein-coding genes  
526 binned. Community (%): sum of the number of reads mapped to the contigs in each MAG  
527 divided by the total number of reads mapped to all contigs including the unbinned contigs,  
528 and normalized to MAG size, assuming an average genome size for all unbinned  
529 populations.

530

531

532 **References**

- 533 1. Whitman WB, Coleman DC, Wiebe WJ. Prokaryotes: The unseen majority. *Proc Natl*  
534 *Acad Sci* 1998; **95**: 6578–6583.
- 535 2. Bardgett RD, Van Der Putten WH. Belowground biodiversity and ecosystem  
536 functioning. *Nature* 2014; **515**: 505–511.
- 537 3. Roesch LFW, Fulthorpe RR, Riva A, Casella G, Hadwin AKM, Kent AD, *et al.*  
538 Pyrosequencing enumerates and contrasts soil microbial diversity. *ISME J* 2007; **1**:  
539 283–290.
- 540 4. Daniel R. The soil metagenome - A rich resource for the discovery of novel natural  
541 products. *Curr Opin Biotechnol* 2004; **15**: 199–204.
- 542 5. Bodor A, Bounedjoum N, Vincze GE, Erdeiné Kis Á, Laczi K, Bende G, *et al.*  
543 Challenges of unculturable bacteria: environmental perspectives. *Rev Environ Sci*  
544 *Biotechnol* 2020; **19**: 1–22.
- 545 6. Houle D, Govindaraju DR, Omholt S. Phenomics: The next challenge. *Nat Rev Genet*  
546 2010; **11**: 855–866.
- 547 7. Ajees AA, Marapakala K, Packianathan C, Sankaran B, Rosen BP. Structure of an  
548 As(III) S-adenosylmethionine methyltransferase: Insights into the mechanism of  
549 arsenic biotransformation. *Biochemistry* 2012; **51**: 5476–5485.
- 550 8. Mori K, Kamagata Y. The challenges of studying the anaerobic microbial world.  
551 *Microbes Environ* 2014; **29**: 335–337.
- 552 9. Dong H, Xu W, Pillai JK, Packianathan C, Rosen BP. High-throughput screening-  
553 compatible assays of As(III) S-adenosylmethionine methyltransferase activity. *Anal*  
554 *Biochem* 2015; **480**: 67–73.
- 555 10. Lomax C, Liu WJ, Wu L, Xue K, Xiong J, Zhou J, *et al.* Methylated arsenic species in  
556 plants originate from soil microorganisms. *New Phytol* 2012; **193**: 665–672.
- 557 11. Zhao FJ, Zhu YG, Meharg AA. Methylated arsenic species in rice: Geographical  
558 variation, origin, and uptake mechanisms. *Environ Sci Technol* 2013; **47**: 3957–3966.
- 559 12. Zheng MZ, Li G, Sun GX, Shim H, Cai C. Differential toxicity and accumulation of

- 560 inorganic and methylated arsenic in rice. *Plant Soil* 2013; **365**: 227–238.
- 561 13. Abedin MJ, Feldmann J, Meharg AA. Uptake kinetics of arsenic species in rice plants.  
562 *Plant Physiol* 2002; **128**: 1120–1128.
- 563 14. Dunivin TK, Yeh SY, Shade A. A global survey of arsenic-related genes in soil  
564 microbiomes. *BMC Biol* 2019; **17**: 45.
- 565 15. Jia Y, Huang H, Zhong M, Wang F-H, Zhang L-M, Zhu Y-G. Microbial arsenic  
566 methylation in soil and rice rhizosphere. *Environ Sci Technol* 2013; **47**: 3141–3148.
- 567 16. Xiao KQ, Li LG, Ma LP, Zhang SY, Bao P, Zhang T, *et al.* Metagenomic analysis  
568 revealed highly diverse microbial arsenic metabolism genes in paddy soils with low-  
569 arsenic contents. *Environ Pollut* 2016; **211**: 1–8.
- 570 17. Zhang SY, Su JQ, Sun GX, Yang Y, Zhao Y, Ding J, *et al.* Land scale biogeography  
571 of arsenic biotransformation genes in estuarine wetland. *Environ Microbiol* 2017; **19**:  
572 2468–2482.
- 573 18. Chen J, Rosen BP. The arsenic methylation cycle: How microbial communities  
574 adapted methylarsenicals for use as weapons in the continuing war for dominance.  
575 *Front Environ Sci* 2020; **8**: 43.
- 576 19. Ping Li Y, Ben Fekih I, Chi Fru E, Moraleda-Munoz A, Li X, Rosen BP, *et al.*  
577 Antimicrobial activity of metals and metalloids. *Annu Rev Microbiol* 2021; **75**: 175–  
578 197.
- 579 20. Yang Y, Wu S, Lilley RM, Zhang R. The diversity of membrane transporters encoded  
580 in bacterial arsenic-resistance operons. *PeerJ* 2015; **3**: e943.
- 581 21. Yang P, Ke C, Zhao C, Kuang Q, Liu B, Xue X, *et al.* ArsM-mediated arsenite  
582 volatilization is limited by efflux catalyzed by As efflux transporters. *Chemosphere*  
583 2020; **239**: 124822.
- 584 22. Viacava K, Meibom KL, Ortega D, Dyer S, Gelb A, Falquet L, *et al.* Variability in  
585 arsenic methylation efficiency across aerobic and anaerobic microorganisms. *Environ*  
586 *Sci Technol* 2020; **54**: 14343–14351.
- 587 23. Thomas F, Diaz-Bone RA, Wuerfel O, Huber B, Weidenbach K, Schmitz RA, *et al.*

- 588 Connection between multimetal(loid) methylation in methanoarchaea and central  
589 intermediates of methanogenesis. *Appl Environ Microbiol* 2011; **77**: 8669–8675.
- 590 24. Wang PP, Bao P, Sun GX. Identification and catalytic residues of the arsenite  
591 methyltransferase from a sulfate-reducing bacterium, *Clostridium* sp. BXM. *FEMS*  
592 *Microbiol Lett* 2015; **362**: 1–8.
- 593 25. Reid MC, Maillard J, Bagnoud A, Falquet L, Le Vo P, Bernier-Latmani R. Arsenic  
594 methylation dynamics in a rice paddy soil anaerobic enrichment culture. *Environ Sci*  
595 *Technol* 2017; **51**: 10546–10554.
- 596 26. Bright DA, Brock S, Reimer KJ, Cullen WR, Hewitt GM, Jafaar J. Methylation of  
597 arsenic by anaerobic microbial consortia isolated from lake sediment. *Appl*  
598 *Organomet Chem* 1994; **8**: 415–422.
- 599 27. Andrews S. FastQC: A quality control tool for high throughput sequence data [Online].  
600 <http://www.bioinformatics.babraham.ac.uk/projects/fastqc/>. .
- 601 28. Xu H, Luo X, Qian J, Pang X, Song J, Qian G, *et al.* FastUniq: A fast *de novo*  
602 duplicates removal tool for paired short reads. *PLoS One* 2012; **7**: e52249.
- 603 29. Li D, Liu CM, Luo R, Sadakane K, Lam TW. MEGAHIT: An ultra-fast single-node  
604 solution for large and complex metagenomics assembly via succinct de Bruijn graph.  
605 *Bioinformatics* 2015; **31**: 1674–1676.
- 606 30. Bray NL, Pimentel H, Melsted P, Pachter L. Near-optimal probabilistic RNA-seq  
607 quantification. *Nat Biotechnol* 2016; **34**: 525–527.
- 608 31. Schaeffer L, Pimentel H, Bray N, Melsted P, Pachter L. Pseudoalignment for  
609 metagenomic read assignment. *Bioinformatics* 2017; **33**: 2082–2088.
- 610 32. Wagner GP, Kin K, Lynch VJ. Measurement of mRNA abundance using RNA-seq  
611 data: RPKM measure is inconsistent among samples. *Theory Biosci* 2012; **131**: 281–  
612 285.
- 613 33. Hyatt D, Chen GL, LoCascio PF, Land ML, Larimer FW, Hauser LJ. Prodigal:  
614 Prokaryotic gene recognition and translation initiation site identification. *BMC*  
615 *Bioinformatics* 2010; **11**: 119.

- 616 34. Kanehisa M, Sato Y, Morishima K. BlastKOALA and GhostKOALA: KEGG tools for  
617 functional characterization of genome and metagenome sequences. *J Mol Biol* 2016;  
618 **428**: 726–731.
- 619 35. Bengtsson-Palme J, Hartmann M, Eriksson KM, Pal C, Thorell K, Larsson DGJ, *et al.*  
620 Metaxa2: Improved identification and taxonomic classification of small and large  
621 subunit rRNA in metagenomic data. *Mol Ecol Resour* 2015; **15**: 1403–1414.
- 622 36. Alneberg J, Bjarnason BS, De Bruijn I, Schirmer M, Quick J, Ijaz UZ, *et al.* Binning  
623 metagenomic contigs by coverage and composition. *Nat Methods* 2014; **11**: 1144–  
624 1146.
- 625 37. Kang DD, Li F, Kirton E, Thomas A, Egan R, An H, *et al.* MetaBAT 2: An adaptive  
626 binning algorithm for robust and efficient genome reconstruction from metagenome  
627 assemblies. *PeerJ* 2019; e7359.
- 628 38. Wu YW, Simmons BA, Singer SW. MaxBin 2.0: An automated binning algorithm to  
629 recover genomes from multiple metagenomic datasets. *Bioinformatics* 2016; **32**: 605–  
630 607.
- 631 39. Uritskiy G V., Diruggiero J, Taylor J. MetaWRAP - A flexible pipeline for genome-  
632 resolved metagenomic data analysis. *Microbiome* 2018; **6**: 158.
- 633 40. Parks DH, Imelfort M, Skennerton CT, Hugenholtz P, Tyson GW. CheckM: Assessing  
634 the quality of microbial genomes recovered from isolates, single cells, and  
635 metagenomes. *Genome Res* 2015; **25**: 1043–1055.
- 636 41. Olm MR, Brown CT, Brooks B, Banfield JF. DRep: A tool for fast and accurate  
637 genomic comparisons that enables improved genome recovery from metagenomes  
638 through de-replication. *ISME J* 2017; **11**: 2864–2868.
- 639 42. Bolger AM, Lohse M, Usadel B. Trimmomatic: A flexible trimmer for Illumina sequence  
640 data. *Bioinformatics* 2014; **30**: 2114–2120.
- 641 43. Kopylova E, Noé L, Touzet H. SortMeRNA: Fast and accurate filtering of ribosomal  
642 RNAs in metatranscriptomic data. *Bioinformatics* 2012; **28**: 3211–3217.
- 643 44. Langmead B, Salzberg SL. Fast gapped-read alignment with Bowtie 2. *Nat Methods*



- 644           2012; **9**: 357–359.
- 645   45.   Liao Y, Smyth GK, Shi W. featureCounts: An efficient general purpose program for  
646           assigning sequence reads to genomic features. *Bioinformatics* 2014; **30**: 923–930.
- 647   46.   Love MI, Huber W, Anders S. Moderated estimation of fold change and dispersion for  
648           RNA-seq data with DESeq2. *Genome Biol* 2014; **15**: 550.
- 649   47.   Washburn MP, Wolters D, Yates JR. Large-scale analysis of the yeast proteome by  
650           multidimensional protein identification technology. *Nat Biotechnol* 2001; **19**: 242–247.
- 651   48.   McDonald WH, Ohi R, Miyamoto DT, Mitchison TJ, Yates JR. Comparison of three  
652           directly coupled HPLC MS/MS strategies for identification of proteins from complex  
653           mixtures: Single-dimension LC-MS/MS, 2-phase MudPIT, and 3-phase MudPIT. *Int J*  
654           *Mass Spectrom* 2002; **219**: 245–251.
- 655   49.   Clarkson SM, Giannone RJ, Kridelbaugh DM, Elkins JG, Guss AM, Michenera JK.  
656           Construction and optimization of a heterologous pathway for protocatechuate  
657           catabolism in *Escherichia coli* enables bioconversion of model aromatic compounds.  
658           *Appl Environ Microbiol* 2017; **83**.
- 659   50.   Dorfer V, Pichler P, Stranzl T, Stadlmann J, Taus T, Winkler S, *et al.* MS Amanda, a  
660           universal identification algorithm optimized for high accuracy tandem mass spectra. *J*  
661           *Proteome Res* 2014; **13**: 3679–3684.
- 662   51.   Käll L, Canterbury JD, Weston J, Noble WS, MacCoss MJ. Semi-supervised learning  
663           for peptide identification from shotgun proteomics datasets. *Nat Methods* 2007; **4**:  
664           923–925.
- 665   52.   Polpitiya AD, Qian WJ, Jaitly N, Petyuk VA, Adkins JN, Camp DG, *et al.* DANTE: A  
666           statistical tool for quantitative analysis of -omics data. *Bioinformatics* 2008; **24**: 1556–  
667           1558.
- 668   53.   Tyanova S, Temu T, Sinitcyn P, Carlson A, Hein MY, Geiger T, *et al.* The Perseus  
669           computational platform for comprehensive analysis of (prote)omics data. *Nat Methods*  
670           2016; **13**: 731–740.
- 671   54.   Bowers RM, Kyripides NC, Stepanauskas R, Harmon-Smith M, Doud D, Reddy TBK,

- 672 *et al.* Minimum information about a single amplified genome (MISAG) and a  
673 metagenome-assembled genome (MIMAG) of bacteria and archaea. *Nat Biotechnol*  
674 2017; **35**: 725–731.
- 675 55. Lin Y-F, Walmsley AR, Rosen BP. An arsenic metallochaperone for an arsenic  
676 detoxification pump. *PNAS* 2006; **103**: 15617–15622.
- 677 56. Shi W, Wu J, Rosen BP. Identification of a putative metal binding site in a new family  
678 of metalloregulatory proteins. *J Biol Chem* 1994; **269**: 19826–19829.
- 679 57. Murphy JN, Saltikov CW. The ArsR repressor mediates arsenite-dependent regulation  
680 of arsenate respiration and detoxification operons of *Shewanella sp.* strain ANA-3. *J*  
681 *Bacteriol* 2009; **191**: 6722–6731.
- 682 58. Santha S, Pandaranayaka EPJ, Rosen BP, Thiyagarajan S. Purification,  
683 crystallization and preliminary X-ray diffraction studies of the arsenic repressor ArsR  
684 from *Corynebacterium glutamicum*. *Acta Crystallogr Sect F Struct Biol Cryst Commun*  
685 2011; **67**: 1616–1618.
- 686 59. Fekih I Ben, Zhang C, Li YP, Zhao Y, Alwathnani HA, Saquib Q, *et al.* Distribution of  
687 arsenic resistance genes in prokaryotes. *Front Microbiol* 2018; **9**: 2473.
- 688 60. Cai L, Yu K, Yang Y, Chen BW, Li XD, Zhang T. Metagenomic exploration reveals  
689 high levels of microbial arsenic metabolism genes in activated sludge and coastal  
690 sediments. *Appl Microbiol Biotechnol* 2013; **97**: 9579–9588.
- 691 61. Huang K, Xu Y, Packianathan C, Gao F, Chen C, Zhang J, *et al.* Arsenic methylation  
692 by a novel ArsM As(III) S-adenosylmethionine methyltransferase that requires only  
693 two conserved cysteine residues. *Mol Microbiol* 2018; **107**: 265–276.
- 694 62. Zhang J, Cao T, Tang Z, Shen Q, Rosen BP, Zhao FJ. Arsenic methylation and  
695 volatilization by arsenite S-adenosylmethionine methyltransferase in *Pseudomonas*  
696 *alcaligenes* NBRC14159. *Appl Environ Microbiol* 2015; **81**: 2852–2860.
- 697 63. Huang K, Chen C, Zhang J, Tang Z, Shen Q, Rosen BP, *et al.* Efficient arsenic  
698 methylation and volatilization mediated by a novel bacterium from an arsenic-  
699 contaminated paddy soil. *Environ Sci Technol* 2016; **50**: 6389–6396.

- 700 64. Yin XX, Chen J, Qin J, Sun GX, Rosen BP, Zhu YG. Biotransformation and  
701 volatilization of arsenic by three photosynthetic cyanobacteria. *Plant Physiol* 2011;  
702 **156**: 1631–1638.
- 703 65. Zhao C, Zhang Y, Chan Z, Chen S, Yang S. Insights into arsenic multi-operons  
704 expression and resistance mechanisms in *Rhodopseudomonas palustris* CGA009.  
705 *Front Microbiol* 2015; **6**: 986.
- 706 66. Wang G, Kennedy SP, Fasiludeen S, Rensing C, DasSarma S. Arsenic resistance in  
707 Halobacterium sp. strain NRC-1 examined by using an improved gene knockout  
708 system. *J Bacteriol* 2004; **186**: 3187–3194.
- 709 67. Tao Y, Zhu X, Wang H, Wang Y, Li X, Jin H, *et al.* Complete genome sequence of  
710 *Ruminococcaceae* bacterium CPB6: A newly isolated culture for efficient n-caproic  
711 acid production from lactate. *J Biotechnol* 2017; **259**: 91–94.
- 712 68. Chen J, Bhattacharjee H, Rosen BP. ArsH is an organoarsenical oxidase that confers  
713 resistance to trivalent forms of the herbicide monosodium methylarsenate and the  
714 poultry growth promoter roxarsone. *Mol Microbiol* 2015; **96**: 1042–1052.
- 715 69. Yoshinaga M, Rosen BP. A C-As lyase for degradation of environmental  
716 organoarsenical herbicides and animal husbandry growth promoters. *PNAS* 2014;  
717 **111**: 7701–7706.
- 718 70. Chen J, Madegowda M, Bhattacharjee H, Rosen BP. ArsP: A methylarsenite efflux  
719 permease. *Mol Microbiol* 2015; **98**: 625–635.
- 720 71. Chen J, Nadar VS, Rosen BP. A novel MAs(III)-selective ArsR transcriptional  
721 repressor. *Mol Microbiol* 2017; **106**: 469–478.
- 722 72. Doyle CJ, O'Toole PW, Cotter PD. Genomic characterization of sulphite reducing  
723 bacteria isolated from the dairy production chain. *Front Microbiol* 2018; **9**: 1507.
- 724 73. Czyzewski BK, Wang DN. Identification and characterization of a bacterial  
725 hydrosulphide ion channel. *Nature* 2012; **483**: 494–497.
- 726 74. Huang CJ, Barrett EL. Sequence analysis and expression of the *Salmonella*  
727 *typhimurium* *asr* operon encoding production of hydrogen sulfide from sulfite. *J*

- 728            *Bacteriol* 1991; **173**: 1544–1553.
- 729    75.    Harmon SM, Kautter DA, Peeler JT. Improved medium for enumeration of *Clostridium*  
730            *perfringens*. *Appl Microbiol* 1971; **22**: 688–692.
- 731    76.    George WL, Sutter VL, Finegold SM. Toxigenicity and antimicrobial susceptibility of  
732            *Clostridium difficile*, a cause of antimicrobial agent-associated colitis. *Curr Microbiol*  
733            1978; **1**: 55–58.
- 734    77.    Wang M, Tang Z, Chen XP, Wang X, Zhou WX, Tang Z, *et al*. Water management  
735            impacts the soil microbial communities and total arsenic and methylated arsenicals in  
736            rice grains. *Environ Pollut* 2019; **247**: 736–744.
- 737    78.    Chen C, Li L, Huang K, Zhang J, Xie WY, Lu Y, *et al*. Sulfate-reducing bacteria and  
738            methanogens are involved in arsenic methylation and demethylation in paddy soils.  
739            *ISME J* 2019; **13**: 2523–2535.
- 740    79.    Zeng X, Jiang Y, Fan X, Chao S, Yang Y, Liu J, *et al*. Effects of sulfate application on  
741            inhibiting accumulation and alleviating toxicity of arsenic in *Panax notoginseng* grown  
742            in arsenic-polluted soil. *Water Air Soil Pollut* 2016; **227**.
- 743    80.    Mestrot A, Feldmann J, Krupp EM, Hossain MS, Roman-Ross G, Meharg AA. Field  
744            fluxes and speciation of arsines emanating from soils. *Environ Sci Technol* 2011; **45**:  
745            1798–1804.
- 746    81.    Huang H, Jia Y, Sun G-X, Zhu Y-G. Arsenic speciation and volatilization from flooded  
747            paddy soils amended with different organic matters. *Environ Sci Technol* 2012; **46**:  
748            2163–8.
- 749    82.    Seyfferth AL, Morris AH, Gill R, Kearns KA, Mann JN, Paukett M, *et al*. Soil  
750            incorporation of silica-rich rice husk decreases inorganic arsenic in rice grain. *J Agric*  
751            *Food Chem* 2016; **64**: 3760–3766.
- 752    83.    Zhao FJ, Harris E, Yan J, Ma J, Wu L, Liu W, *et al*. Arsenic methylation in soils and its  
753            relationship with microbial *arsM* abundance and diversity, and As speciation in rice.  
754            *Environ Sci Technol* 2013; 7147–7154.
- 755    84.    Gutleben J, Chaib De Mares M, van Elsas JD, Smidt H, Overmann J, Sipkema D. The

- 756 multi-omics promise in context: From sequence to microbial isolate. *Crit Rev Microbiol*  
757 2018; **44**: 212–229.
- 758 85. Chandran H, Meena M, Sharma K. Microbial biodiversity and bioremediation  
759 assessment through omics approaches. *Front Environ Chem* 2020; **1**: 9.
- 760 86. Chen S-C, Sun G-X, Yan Y, Konstantinidis KT, Zhang S-Y, Deng Y, *et al.* The Great  
761 Oxidation Event expanded the genetic repertoire of arsenic metabolism and cycling.  
762 *PNAS* 2020; **117**: 10414–10421.
- 763 87. Liu S, Zhang F, Chen J, Sun G. Arsenic removal from contaminated soil via  
764 biovolatilization by genetically engineered bacteria under laboratory conditions. *J*  
765 *Environ Sci* 2011; **23**: 1544–1550.
- 766 88. Chen J, Sun GX, Wang XX, Lorenzo V De, Rosen BP, Zhu YG. Volatilization of  
767 arsenic from polluted soil by *Pseudomonas putida* engineered for expression of the  
768 *arsM* arsenic(III) S-adenosine methyltransferase gene. *Environ Sci Technol* 2014; **48**:  
769 10337–10344.
- 770

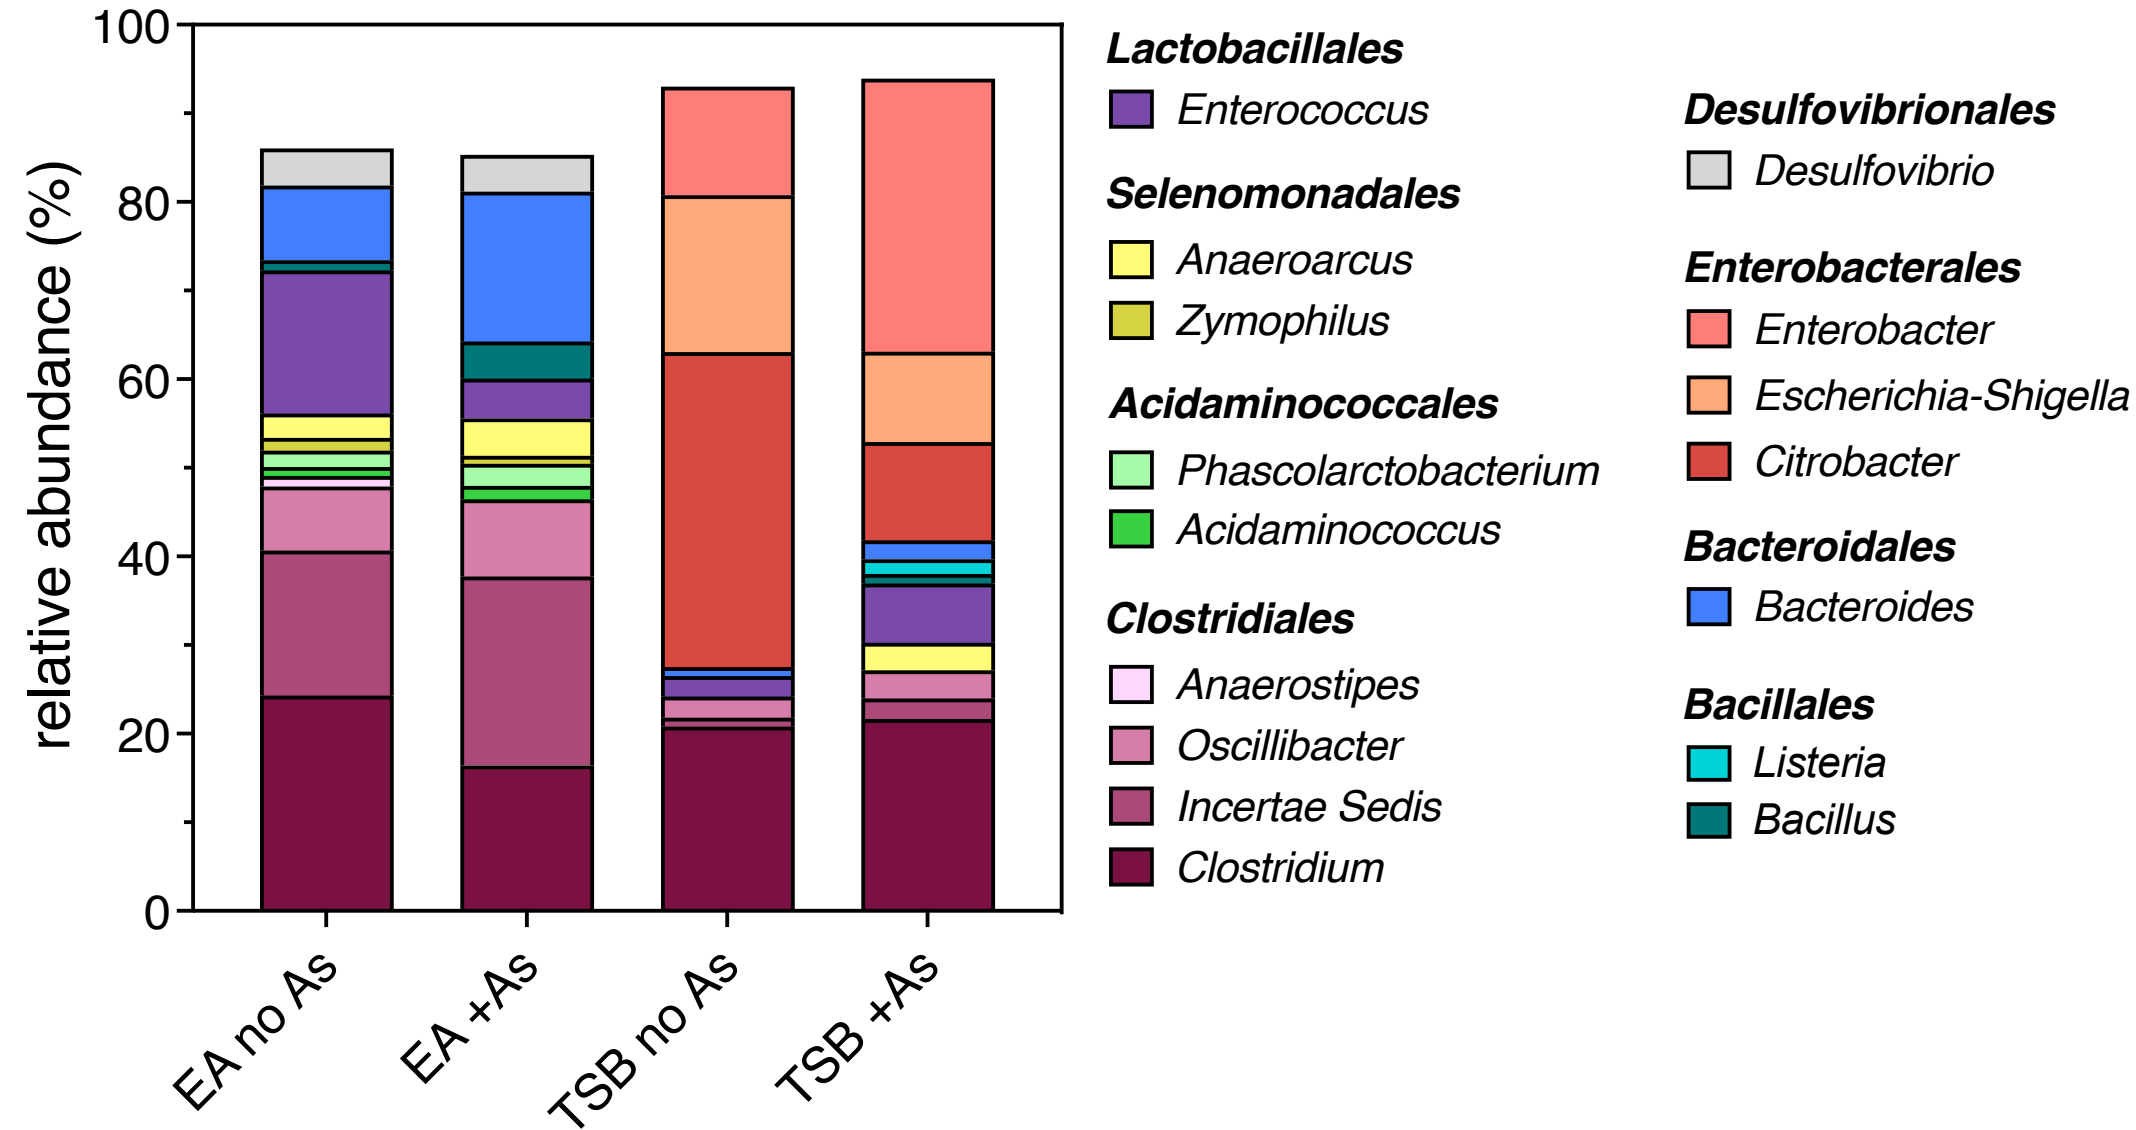

## EA +As

## TSB +As

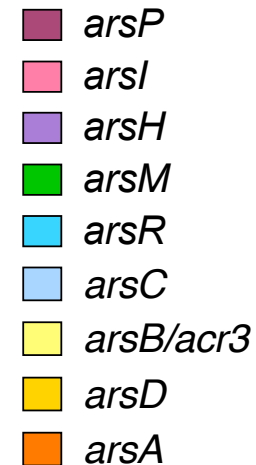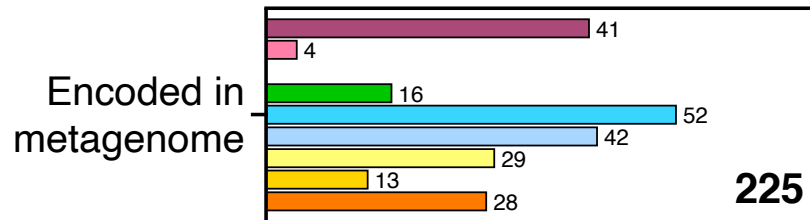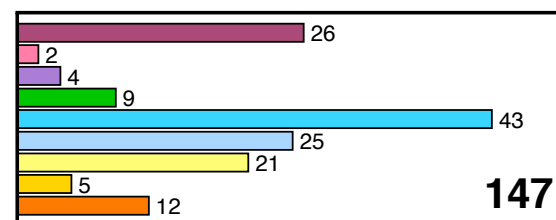

Increased expression in metatranscriptome R

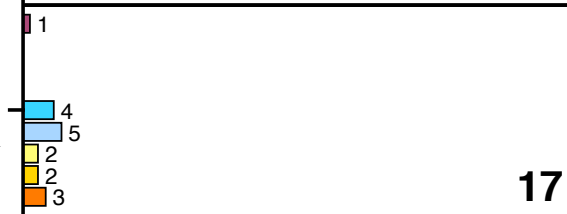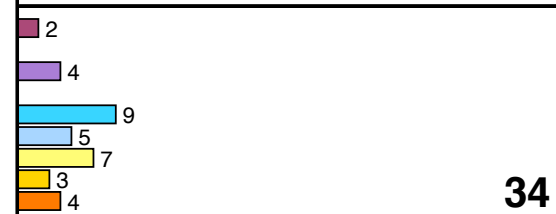

Increased expression in metatranscriptome G

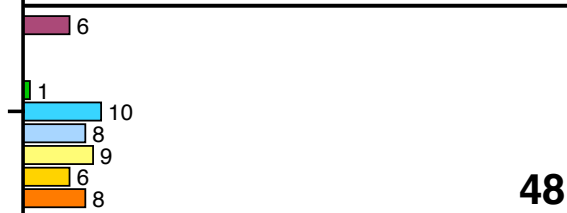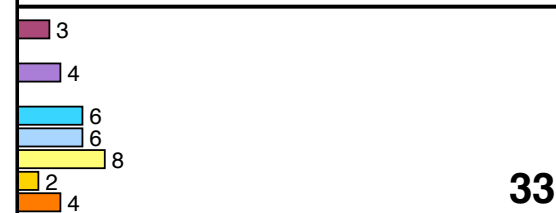

Increased expression in metaproteome

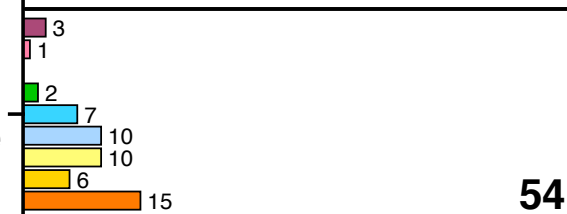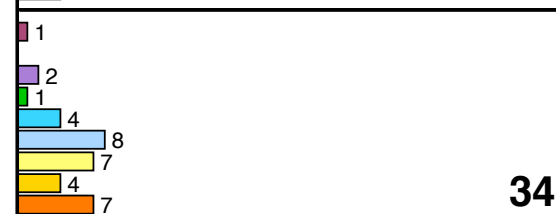

Increase expression in metatranscriptome G, metatranscriptome R and/or metaproteome

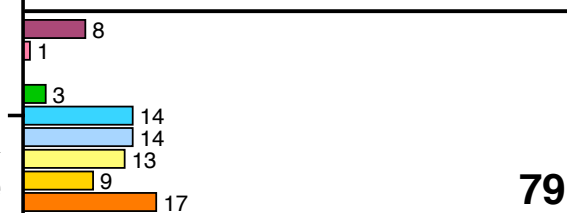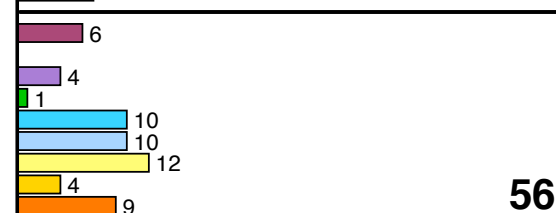

0

20

40

60

*ars* genes

0

20

40

FA 2 As

TSB 1 As

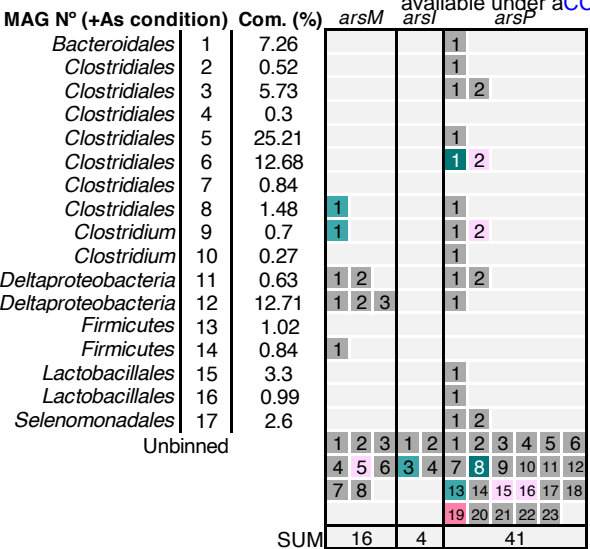

Present in (+As condition):

Metagenome 

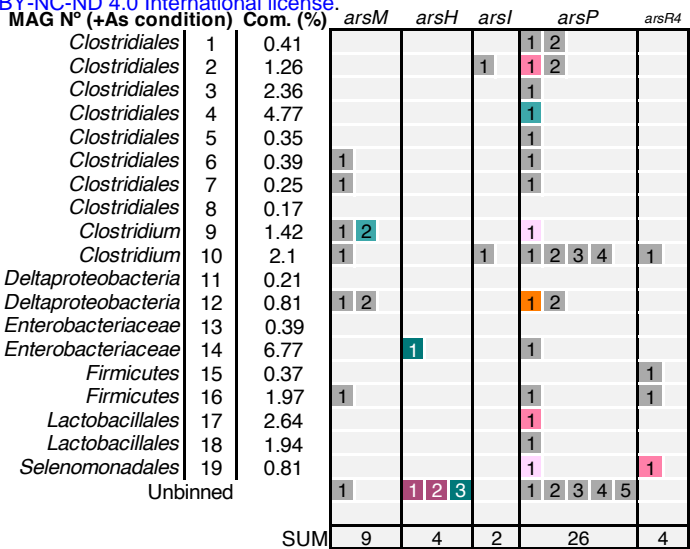

Expression fold change (FC) vs. no-As control:

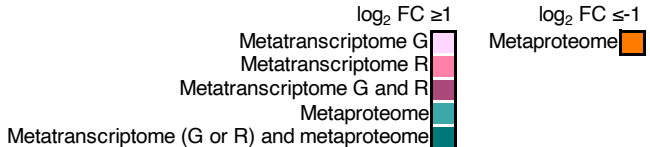



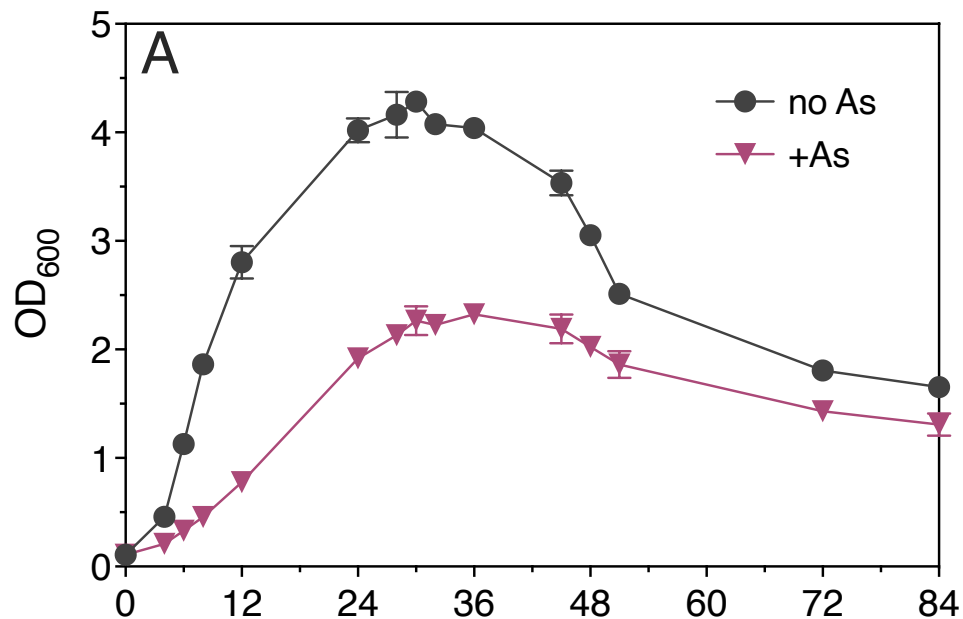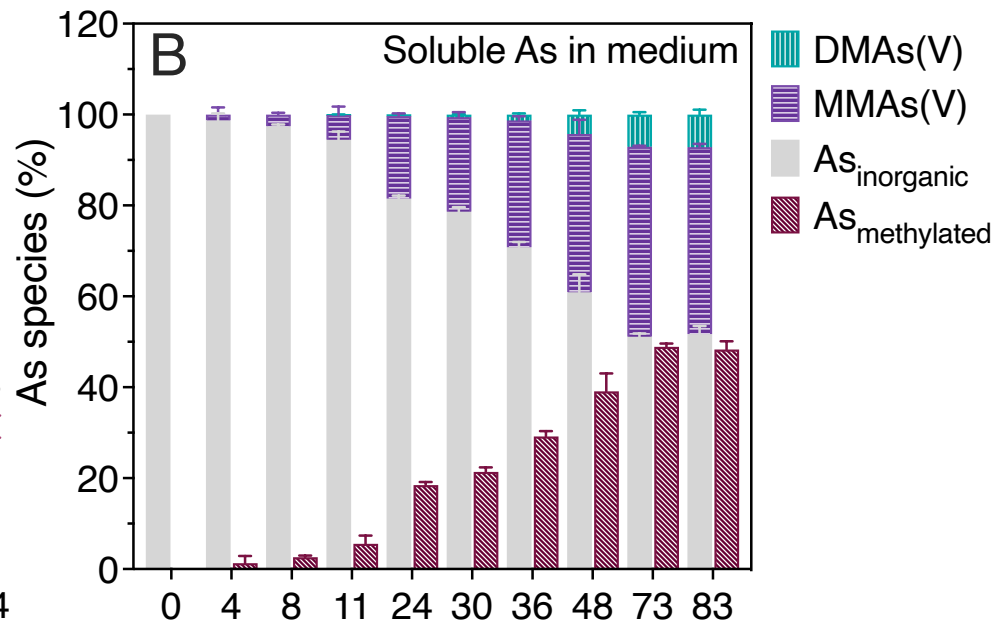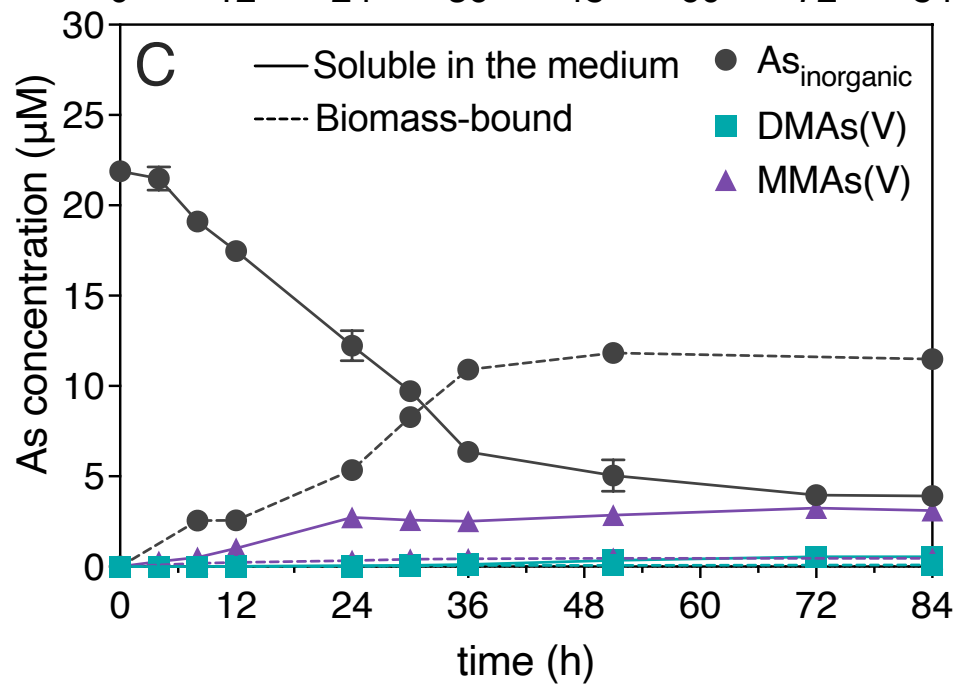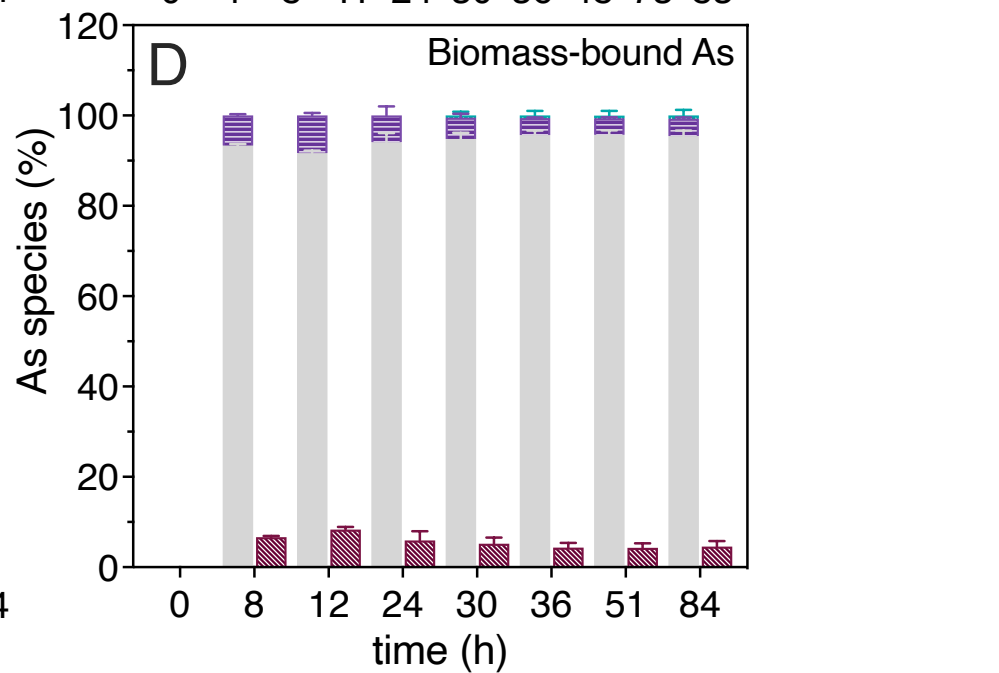

## EA +As

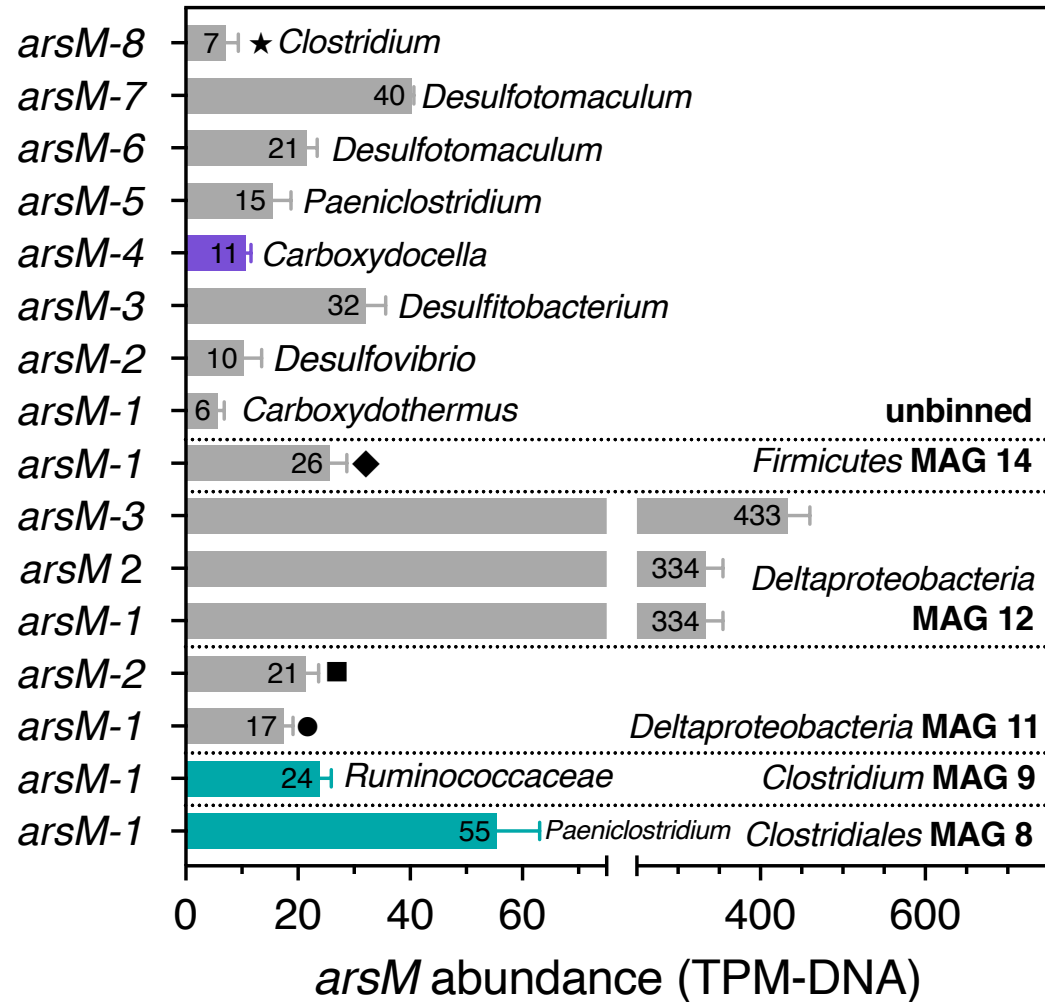

## TSB +As

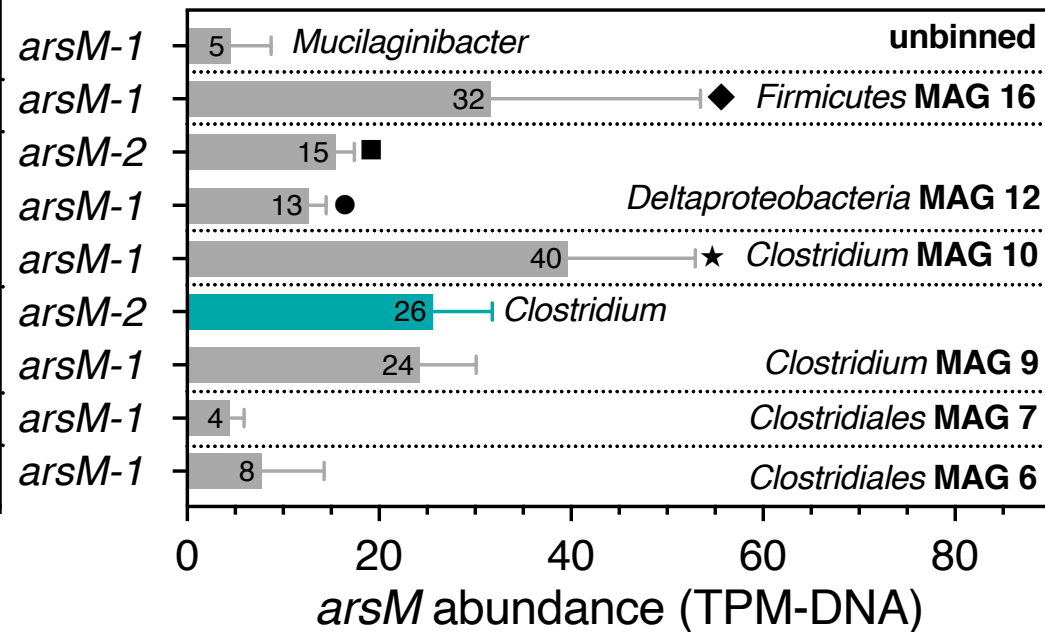

Table 1. Metagenome assembled genomes (MAGs) from EA (upper Table A) and TSB (lower Table B) cultures in the +As condition. Marker lineage: taxonomic rank set by CheckM. Completeness and contamination (%): estimated completeness and contamination of genome as determined by CheckM from the presence/absence of single-copy marker genes and the expected colocalization of these genes. Strain heterogeneity: index between 0 and 100 where a value of 0 means no strain heterogeneity, high values suggest the majority of reported contamination is from closely related organisms (i.e., potentially the same species) and low values suggest the majority of contamination is from phylogenetically diverse sources. Proportion of binned proteins assigned to MAG (%): number of protein-coding genes assigned to the MAG divided by the total number of protein-coding genes binned. Community (%): sum of the number of reads mapped to the contigs in each MAG divided by the total number of reads mapped to all contigs including the unbinned contigs, and normalized to MAG size, assuming an average genome size for all unbinned populations.

A

| MAG | Bin | Marker lineage*                | Completeness (%) | Contamination (%) | Strain heterogeneity (%) | Genome size (Mbp) | Community (%) | GC content | ArsM-encoding genes | Binner § |
|-----|-----|--------------------------------|------------------|-------------------|--------------------------|-------------------|---------------|------------|---------------------|----------|
| 1   | 36  | <i>Bacteroidales</i> (o)       | 98.5             | 0.4               | 0.0                      | 3.8               | 7.26 ±0.32    | 39.1       | 0                   | A        |
| 2   | 15  | <i>Clostridiales</i> (o)       | 98.7             | 0.0               | 0.0                      | 2.2               | 0.52 ±0.06    | 58.4       | 0                   | B        |
| 3   | 21  | <i>Clostridiales</i> (o)       | 95.2             | 0.0               | 0.0                      | 4.3               | 5.73 ±0.24    | 28.5       | 0                   | C        |
| 4   | 4   | <i>Clostridiales</i> (o)       | 90.7             | 0.0               | 0.0                      | 2.1               | 0.30 ±0.03    | 57.5       | 0                   | A        |
| 5   | 24  | <i>Clostridiales</i> (o)       | 97.8             | 0.3               | 0.0                      | 2.0               | 25.21 ±0.23   | 43.2       | 0                   | A        |
| 6   | 9   | <i>Clostridiales</i> (o)       | 100.0            | 1.3               | 50.0                     | 3.2               | 12.68 ±0.68   | 54.9       | 0                   | A        |
| 7   | 35  | <i>Clostridiales</i> (o)       | 98.0             | 3.3               | 55.6                     | 5.3               | 0.84 ±0.21    | 44.0       | 0                   | A        |
| 8   | 31  | <i>Clostridiales</i> (o)       | 97.9             | 3.5               | 0.0                      | 3.8               | 1.48 ±0.12    | 28.2       | 1                   | A        |
| 9   | 20  | <i>Clostridium</i> (g)         | 97.2             | 2.2               | 0.0                      | 3.4               | 0.70 ±0.06    | 30.1       | 1                   | C        |
| 10  | 18  | <i>Clostridium</i> (g)         | 96.5             | 2.9               | 16.7                     | 4.0               | 0.27 ±0.05    | 30.0       | 0                   | A        |
| 11  | 11  | <i>Deltaproteobacteria</i> (o) | 99.2             | 0.7               | 100.0                    | 3.4               | 0.63 ±0.05    | 57.4       | 2                   | BC       |
| 12  | 33  | <i>Deltaproteobacteria</i> (o) | 100.0            | 1.2               | 0.0                      | 3.3               | 12.71 ±0.49   | 57.8       | 3                   | BC       |
| 13  | 28  | <i>Firmicutes</i> (p)          | 99.9             | 0.0               | 0.0                      | 2.5               | 1.02 ±0.10    | 47.2       | 0                   | B        |
| 14  | 27  | <i>Firmicutes</i> (p)          | 91.9             | 3.3               | 92.3                     | 3.1               | 0.84 ±0.07    | 49.2       | 1                   | BC       |
| 15  | 8   | <i>Lactobacillales</i> (o)     | 99.6             | 0.0               | 0.0                      | 2.7               | 3.30 ±0.61    | 36.8       | 0                   | A        |
| 16  | 1   | <i>Lactobacillales</i> (o)     | 99.3             | 4.6               | 0.0                      | 4.1               | 0.99 ±0.05    | 39.1       | 0                   | BC       |
| 17  | 16  | <i>Selenomonadales</i> (o)     | 100.0            | 1.5               | 0.0                      | 2.2               | 2.60 ±0.24    | 41.3       | 0                   | C        |

\* (p) phylum, (o) order, or (g) genus.

§ A,B and C refer to MetaBAT 2, MaxBin 2.0 and CONCOCT respectively.

B

| MAG | Bin | Marker lineage*                | Completeness (%) | Contamination (%) | Strain heterogeneity (%) | Genome size (Mbp) | Community (%) | GC content | N. of ArsM-encoding genes | Binner § |
|-----|-----|--------------------------------|------------------|-------------------|--------------------------|-------------------|---------------|------------|---------------------------|----------|
| 1   | 12  | <i>Clostridiales</i> (o)       | 100.0            | 0.0               | 0.0                      | 3.1               | 0.41 ±0.03    | 54.8       | 0                         | B        |
| 2   | 9   | <i>Clostridiales</i> (o)       | 98.9             | 0.0               | 0.0                      | 4.7               | 1.26 ±0.24    | 28.4       | 0                         | C        |
| 3   | 39  | <i>Clostridiales</i> (o)       | 98.0             | 0.3               | 0.0                      | 2.0               | 2.36 ±0.51    | 43.2       | 0                         | A        |
| 4   | 4   | <i>Clostridiales</i> (o)       | 99.3             | 0.7               | 100.0                    | 2.7               | 4.77 ±3.14    | 56.1       | 0                         | A        |
| 5   | 16  | <i>Clostridiales</i> (o)       | 98.7             | 0.9               | 0.0                      | 2.8               | 0.35 ±0.21    | 35.7       | 0                         | A        |
| 6   | 19  | <i>Clostridiales</i> (o)       | 99.2             | 1.1               | 0.0                      | 3.5               | 0.39 ±0.28    | 31.2       | 1                         | BC       |
| 7   | 1   | <i>Clostridiales</i> (o)       | 98.7             | 1.3               | 50.0                     | 2.6               | 0.25 ±0.07    | 56.1       | 1                         | A        |
| 8   | 15  | <i>Clostridiales</i> (o)       | 97.3             | 2.5               | 16.7                     | 2.7               | 0.17 ±0.02    | 60.5       | 0                         | C        |
| 9   | 28  | <i>Clostridium</i> (g)         | 99.3             | 5.5               | 23.1                     | 5.6               | 1.42 ±0.30    | 30.1       | 2                         | A        |
| 10  | 27  | <i>Clostridium</i> (g)         | 98.6             | 6.9               | 0.0                      | 4.6               | 2.10 ±0.60    | 32.3       | 1                         | A        |
| 11  | 32  | <i>Deltaproteobacteria</i> (o) | 94.8             | 0.0               | 0.0                      | 3.1               | 0.21 ±0.06    | 59.3       | 0                         | BC       |
| 12  | 38  | <i>Deltaproteobacteria</i> (o) | 98.3             | 1.8               | 50.0                     | 3.4               | 0.81 ±0.08    | 57.6       | 2                         | BC       |
| 13  | 10  | <i>Enterobacteriaceae</i> (f)  | 96.6             | 0.7               | 33.3                     | 4.3               | 0.39 ±0.08    | 52.8       | 0                         | B        |
| 14  | 42  | <i>Enterobacteriaceae</i> (f)  | 95.7             | 2.1               | 12.5                     | 5.1               | 6.77 ±0.35    | 56.3       | 0                         | BC       |
| 15  | 31  | <i>Firmicutes</i> (p)          | 99.9             | 0.0               | 0.0                      | 2.4               | 0.37 ±0.06    | 47.6       | 0                         | A        |
| 16  | 33  | <i>Firmicutes</i> (p)          | 100.0            | 0.6               | 0.0                      | 3.2               | 1.97 ±1.09    | 49.1       | 1                         | BC       |
| 17  | 7   | <i>Lactobacillales</i> (o)     | 99.6             | 0.0               | 0.0                      | 2.9               | 2.64 ±0.52    | 36.5       | 0                         | C        |
| 18  | 5   | <i>Lactobacillales</i> (o)     | 98.9             | 4.2               | 0.0                      | 4.1               | 1.94 ±0.81    | 39.1       | 0                         | AB       |
| 19  | 36  | <i>Selenomonadales</i> (o)     | 100.0            | 1.5               | 0.0                      | 2.3               | 0.81 ±0.11    | 41.1       | 0                         | A        |

\* (p) phylum, (o) order, or (g) genus.

§ A,B and C refer to MetaBAT 2, MaxBin 2.0 and CONCOCT, respectively.
